# Supplementary material
Source: publisher site journal article supplement (https://www.dovepress.com/article/248507)
Supplement: Supplementary file 1 [file get_supplementary_file.php]

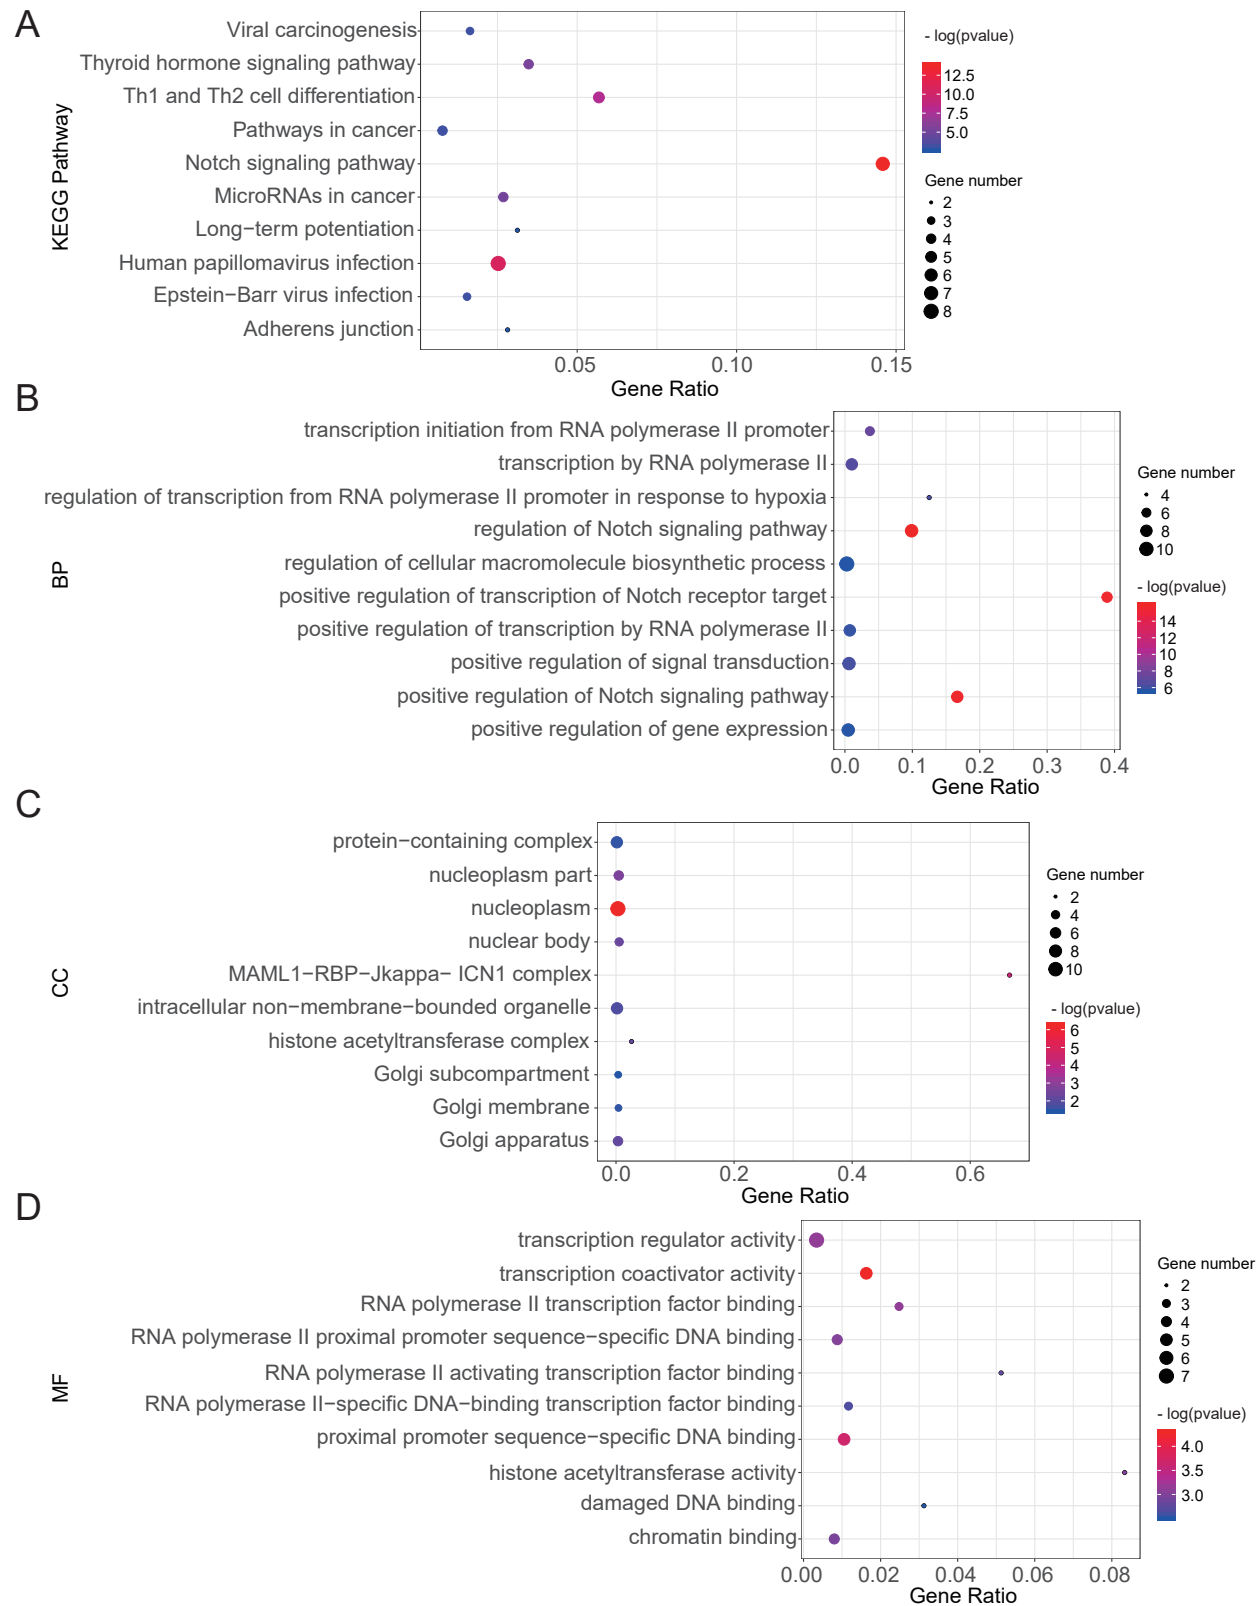

Figure S1: KEGG pathway and Gene Ontology (GO) analysis based on the STRING database. (A) Top 10 KEGG pathways results. (B) Top 10 biological process (BP) results. (C) Top 10 cellular component (CC) results. (D) Top 10 molecular function (MF) results.

**Table S1: The detailed information of ELF3 expression data and corresponding clinicopathological information based on TCGA database.**

| ID                           | futime | fustat | age | gender | grade | stage     | T  | M  | N      | ELF3     | Type   |
|------------------------------|--------|--------|-----|--------|-------|-----------|----|----|--------|----------|--------|
| TCGA-HZ-A77P-01A-11R-A33R-07 | 330    | 0      | 77  | MALE   | G1    | Stage IIB | T3 | MX | N1     | 32.91632 | Tumor  |
| TCGA-IB-AAUR-01A-21R-A38C-07 | 338    | 0      | 67  | MALE   | G1    | Stage IIB | T3 | M0 | N1     | 38.54016 | Tumor  |
| TCGA-3A-A9IV-01A-11R-A41B-07 | 1103   | 0      | 59  | FEMALE | G1    | Stage IB  | T2 | MX | N0     | 19.436   | Tumor  |
| TCGA-2J-AABH-01A-21R-A41B-07 | 677    | 0      | 61  | MALE   | G3    | Stage IIA | T3 | M0 | N0     | 84.19494 | Tumor  |
| TCGA-F2-A44H-01A-11R-A26U-07 | 586    | 0      | 65  | MALE   | G2    | Stage IIA | T3 | M0 | N0     | 32.80712 | Tumor  |
| TCGA-HZ-7924-01A-11R-2156-07 | 840    | 0      | 60  | FEMALE | G2    | Stage IIA | T3 | MX | N0     | 59.65718 | Tumor  |
| TCGA-HZ-A49G-01A-11R-A26U-07 | 660    | 0      | 58  | FEMALE | G2    | Stage IIB | T2 | MX | N1     | 83.69491 | Tumor  |
| TCGA-FB-AAQ2-01A-31R-A41B-07 | 153    | 1      | 81  | FEMALE | G3    | Stage IIB | T3 | MX | N1     | 40.72716 | Tumor  |
| TCGA-2L-AAQE-01A-11R-A39D-07 | 684    | 1      | 56  | MALE   | G2    | Stage IIB | T3 | M0 | N1     | 118.5144 | Tumor  |
| TCGA-IB-AAUM-01A-11R-A37L-07 | 8      | 0      | 76  | MALE   | G3    | Stage IIB | T2 | M0 | N1     | 39.19006 | Tumor  |
| TCGA-HZ-A49I-01A-12R-A26U-07 | 308    | 1      | 77  | MALE   | G2    | Stage IIB | T3 | MX | N1     | 157.2511 | Tumor  |
| TCGA-FB-A4P6-01A-12R-A26U-07 | 363    | 0      | 54  | MALE   | G1    | Stage IIB | T3 | MX | N1     | 84.04365 | Tumor  |
| TCGA-3A-A9IO-01A-11R-A38C-07 | 1942   | 0      | 55  | MALE   | G1    | unknow    | TX | MX | NX     | 2.668527 | Tumor  |
| TCGA-YB-A89D-11A-11R-A36G-07 | 350    | 0      | 59  | MALE   | G2    | Stage IIB | T3 | MX | N1     | 31.32477 | Normal |
| TCGA-YB-A89D-01A-12R-A36G-07 | 350    | 0      | 59  | MALE   | G2    | Stage IIB | T3 | MX | N1     | 80.99443 | Tumor  |
| TCGA-HZ-7925-01A-11R-2156-07 | 614    | 1      | 66  | MALE   | G2    | Stage IIB | T3 | MX | N1     | 61.57104 | Tumor  |
| TCGA-IB-7654-01A-11R-2156-07 | 476    | 1      | 80  | MALE   | G2    | Stage IIB | T2 | M0 | N1     | 28.52972 | Tumor  |
| TCGA-XN-A8T5-01A-12R-A36G-07 | 720    | 0      | 53  | FEMALE | G2    | Stage IB  | T2 | M0 | N0     | 17.35972 | Tumor  |
| TCGA-3A-A9IS-01A-21R-A39D-07 | 998    | 0      | 67  | MALE   | G1    | Stage IB  | T2 | MX | N0     | 4.975891 | Tumor  |
| TCGA-XD-AAUI-01A-42R-A41B-07 | 366    | 1      | 50  | FEMALE | G2    | Stage IIB | T3 | MX | N1     | 64.07799 | Tumor  |
| TCGA-HV-A7OL-01A-11R-A33R-07 | 252    | 0      | 70  | MALE   | G2    | Stage IIA | T3 | MX | N0     | 126.7747 | Tumor  |
| TCGA-HZ-8002-01A-11R-2204-07 | 366    | 1      | 61  | MALE   | G2    | Stage IIB | T3 | MX | N1     | 44.68357 | Tumor  |
| TCGA-3A-A9IL-01A-11R-A38C-07 | 2741   | 0      | 39  | FEMALE | G1    | Stage I   | T1 | MX | unknow | 8.580078 | Tumor  |
| TCGA-3A-A9J0-01A-11R-A41B-07 | 743    | 0      | 75  | MALE   | G2    | Stage IIB | T3 | MX | N1     | 69.62248 | Tumor  |
| TCGA-OE-A75W-01A-12R-A32O-07 | 267    | 1      | 75  | MALE   | G1    | Stage IIA | T3 | M0 | N0     | 132.2706 | Tumor  |
| TCGA-2J-AABF-01A-31R-A41B-07 | 691    | 1      | 73  | MALE   | G3    | Stage IIB | T3 | M0 | N1     | 88.7158  | Tumor  |
| TCGA-FB-AAQ6-01A-11R-A41B-07 | 244    | 1      | 85  | MALE   | G2    | Stage IA  | T1 | MX | N0     | 151.863  | Tumor  |

|                              |      |   |    |        |    |           |        |    |     |          |       |
|------------------------------|------|---|----|--------|----|-----------|--------|----|-----|----------|-------|
| TCGA-PZ-A5RE-01A-11R-A32O-07 | 470  | 1 | 44 | FEMALE | G3 | Stage IIB | T3     | MX | N1  | 110.3475 | Tumor |
| TCGA-2J-AAB9-01A-11R-A41B-07 | 627  | 1 | 70 | FEMALE | G1 | Stage IIB | T3     | M0 | N1  | 43.13908 | Tumor |
| TCGA-2L-AAQJ-01A-12R-A39D-07 | 394  | 1 | 49 | FEMALE | G2 | Stage III | T4     | MX | N0  | 106.3572 | Tumor |
| TCGA-HZ-A4BH-01A-11R-A26U-07 | 194  | 0 | 75 | MALE   | G3 | Stage IIB | T3     | MX | N1b | 69.93497 | Tumor |
| TCGA-FB-AAPU-01A-31R-A41B-07 | 381  | 1 | 41 | FEMALE | G2 | Stage IIA | T3     | MX | N0  | 223.3786 | Tumor |
| TCGA-Z5-AAPL-01A-12R-A41B-07 | 467  | 0 | 74 | FEMALE | G1 | Stage IIA | T3     | M0 | N0  | 30.30895 | Tumor |
| TCGA-FB-AAPQ-01A-11R-A41B-07 | 1130 | 1 | 65 | MALE   | G2 | Stage IIB | T3     | MX | N1  | 130.1008 | Tumor |
| TCGA-HZ-A9TJ-06A-11R-A41B-07 | 603  | 0 | 70 | MALE   | G2 | Stage IV  | T3     | M1 | N0  | 151.129  | Tumor |
| TCGA-HZ-A9TJ-01A-11R-A41I-07 | 603  | 0 | 70 | MALE   | G2 | Stage IV  | T3     | M1 | N0  | 164.7197 | Tumor |
| TCGA-IB-7897-01A-21R-2204-07 | 486  | 1 | 53 | FEMALE | G2 | Stage IIB | T3     | M0 | N1  | 11.54993 | Tumor |
| TCGA-3A-A9I5-01A-11R-A38C-07 | 1794 | 0 | 57 | MALE   | G1 | unknow    | unknow | MX | N0  | 65.01189 | Tumor |
| TCGA-HZ-8315-01A-11R-2404-07 | 299  | 1 | 54 | FEMALE | G2 | Stage IIA | T3     | MX | N0  | 116.7809 | Tumor |
| TCGA-HZ-A8P1-01A-11R-A37L-07 | 7    | 0 | 81 | MALE   | G1 | Stage IB  | T2     | MX | N0  | 159.981  | Tumor |
| TCGA-IB-A7M4-01A-11R-A36G-07 | 483  | 0 | 81 | MALE   | G3 | Stage IIB | T3     | MX | N1  | 57.03035 | Tumor |
| TCGA-FB-AAPZ-01A-11R-A41B-07 | 716  | 0 | 54 | MALE   | G3 | Stage IIB | T2     | MX | N1  | 118.8633 | Tumor |
| TCGA-RB-AA9M-01A-11R-A39D-07 | 286  | 0 | 43 | MALE   | G3 | Stage IIB | T1     | MX | N1  | 110.108  | Tumor |
| TCGA-HZ-8638-01A-11R-2404-07 | 151  | 1 | 84 | FEMALE | GX | Stage IA  | T1     | MX | N0  | 89.819   | Tumor |
| TCGA-LB-A8F3-01A-11R-A36G-07 | 379  | 0 | 64 | FEMALE | G1 | Stage IIA | T3     | MX | N0  | 128.6713 | Tumor |
| TCGA-IB-A7LX-01A-12R-A36G-07 | 250  | 1 | 57 | MALE   | G2 | Stage IIB | T3     | MX | N1  | 110.7974 | Tumor |
| TCGA-IB-7888-01A-11R-2156-07 | 1332 | 1 | 66 | FEMALE | G2 | Stage IIA | T3     | M0 | N0  | 41.50016 | Tumor |
| TCGA-S4-A8RM-01A-11R-A37L-07 | 646  | 0 | 67 | MALE   | G3 | Stage IIB | T3     | MX | N1  | 248.5009 | Tumor |
| TCGA-FB-AAPS-01A-12R-A39D-07 | 228  | 0 | 62 | FEMALE | G2 | Stage IIB | T2     | MX | N1  | 15.91854 | Tumor |
| TCGA-IB-AAUO-01A-12R-A38C-07 | 239  | 1 | 64 | FEMALE | G3 | Stage IIB | T3     | M0 | N1  | 65.49398 | Tumor |
| TCGA-3A-A9IB-01A-21R-A39D-07 | 224  | 1 | 69 | FEMALE | G3 | Stage IIB | T3     | MX | N1  | 52.99745 | Tumor |
| TCGA-FB-AAPP-01A-12R-A41B-07 | 485  | 1 | 71 | MALE   | G3 | Stage IIB | T3     | MX | N1  | 101.8541 | Tumor |
| TCGA-F2-A7TX-01A-33R-A38C-07 | 95   | 1 | 77 | MALE   | G3 | Stage IIB | T3     | M0 | N1  | 34.82555 | Tumor |
| TCGA-Q3-AA2A-01A-11R-A37L-07 | 95   | 0 | 64 | FEMALE | G1 | Stage IB  | T3     | MX | N1  | 158.9036 | Tumor |
| TCGA-LB-A9Q5-01A-11R-A39D-07 | 313  | 1 | 63 | FEMALE | G3 | Stage IIB | T3     | MX | N1  | 26.69217 | Tumor |
| TCGA-XD-AAUH-01A-42R-A41B-07 | 395  | 0 | 57 | FEMALE | G2 | Stage IIB | T3     | M0 | N1  | 28.67008 | Tumor |

|                              |      |   |    |        |    |           |    |    |    |          |        |
|------------------------------|------|---|----|--------|----|-----------|----|----|----|----------|--------|
| TCGA-IB-7649-01A-11R-2156-07 | 467  | 1 | 73 | FEMALE | G2 | Stage IIB | T3 | M0 | N1 | 41.84686 | Tumor  |
| TCGA-IB-A5SO-01A-11R-A32O-07 | 365  | 1 | 71 | MALE   | G2 | Stage IIB | T3 | M0 | N1 | 77.88626 | Tumor  |
| TCGA-3A-A9IJ-01A-11R-A39D-07 | 1854 | 0 | 65 | MALE   | G1 | Stage IB  | T2 | MX | N0 | 2.661031 | Tumor  |
| TCGA-FB-A5VM-01A-11R-A32O-07 | 449  | 0 | 74 | MALE   | G3 | Stage IB  | T2 | M0 | N0 | 42.29446 | Tumor  |
| TCGA-IB-8127-01A-11R-2404-07 | 522  | 0 | 59 | MALE   | G2 | Stage IIB | T3 | M0 | N1 | 71.52919 | Tumor  |
| TCGA-3E-AAAZ-01A-11R-A38C-07 | 2182 | 1 | 71 | MALE   | G2 | Stage IIA | T3 | MX | N0 | 89.19931 | Tumor  |
| TCGA-2J-AABU-01A-11R-A41B-07 | 277  | 1 | 56 | MALE   | G3 | Stage IIB | T3 | M0 | N1 | 32.96733 | Tumor  |
| TCGA-HV-AA8V-01A-11R-A41B-07 | 920  | 0 | 50 | MALE   | G3 | Stage IIB | T3 | MX | N1 | 42.26386 | Tumor  |
| TCGA-IB-AAUU-01A-11R-A37L-07 | 245  | 0 | 35 | MALE   | G3 | Stage IIB | T3 | M0 | N1 | 147.2643 | Tumor  |
| TCGA-IB-A5SS-01A-11R-A32O-07 | 460  | 1 | 64 | FEMALE | G3 | Stage IIB | T3 | M0 | N1 | 49.44647 | Tumor  |
| TCGA-3A-A9IU-01A-11R-A39D-07 | 458  | 1 | 65 | MALE   | G3 | Stage IIB | T3 | MX | N1 | 136.9872 | Tumor  |
| TCGA-3A-A9IN-01A-11R-A39D-07 | 2084 | 0 | 62 | FEMALE | G2 | Stage IB  | T2 | MX | NX | 5.83589  | Tumor  |
| TCGA-FB-A7DR-01A-21R-A33R-07 | 353  | 1 | 48 | MALE   | G2 | Stage IIA | T3 | M0 | NX | 54.48159 | Tumor  |
| TCGA-FB-AAQ0-01A-31R-A41B-07 | 473  | 1 | 68 | MALE   | G3 | Stage IIA | T3 | MX | N0 | 204.2876 | Tumor  |
| TCGA-3A-A9IR-01A-11R-A38C-07 | 1542 | 0 | 64 | FEMALE | G1 | Stage IB  | T2 | MX | N0 | 13.08375 | Tumor  |
| TCGA-IB-7891-01A-11R-2204-07 | 648  | 0 | 49 | FEMALE | G1 | Stage IIB | T3 | M0 | N1 | 63.01435 | Tumor  |
| TCGA-2J-AABI-01A-12R-A41B-07 | 969  | 0 | 55 | FEMALE | G3 | Stage IIA | T3 | M0 | N0 | 21.31916 | Tumor  |
| TCGA-IB-AAUS-01A-12R-A38C-07 | 225  | 0 | 84 | FEMALE | G2 | Stage IIB | T3 | M0 | N1 | 27.12239 | Tumor  |
| TCGA-FB-AAPY-01A-11R-A41B-07 | 1059 | 1 | 71 | MALE   | G2 | Stage IIB | T2 | MX | N1 | 84.48667 | Tumor  |
| TCGA-F2-A44G-01A-11R-A26U-07 | 233  | 1 | 79 | FEMALE | G2 | Stage IIB | T3 | M0 | N1 | 78.79313 | Tumor  |
| TCGA-HV-A5A3-11A-11R-A26U-07 | 128  | 1 | 50 | MALE   | G2 | Stage IIA | T3 | MX | NX | 75.39921 | Normal |
| TCGA-HV-A5A3-01A-11R-A26U-07 | 128  | 1 | 50 | MALE   | G2 | Stage IIA | T3 | MX | NX | 164.2806 | Tumor  |
| TCGA-US-A774-01A-21R-A32O-07 | 695  | 1 | 76 | FEMALE | G3 | Stage IIB | T3 | MX | N1 | 57.34514 | Tumor  |
| TCGA-IB-A5SP-01A-11R-A32O-07 | 482  | 0 | 77 | MALE   | G2 | Stage IIA | T3 | M0 | N0 | 123.6878 | Tumor  |
| TCGA-US-A77E-01A-11R-A32O-07 | 430  | 1 | 73 | MALE   | G3 | Stage IIB | T3 | MX | N1 | 106.4832 | Tumor  |
| TCGA-S4-A8RP-01A-11R-A36G-07 | 702  | 1 | 77 | FEMALE | G3 | Stage IIB | T3 | MX | N1 | 118.4708 | Tumor  |
| TCGA-M8-A5N4-01A-11R-A26U-07 | 584  | 0 | 48 | FEMALE | G2 | Stage IIA | T3 | M0 | N0 | 54.58081 | Tumor  |
| TCGA-HZ-8001-01A-11R-2204-07 | 706  | 0 | 69 | MALE   | G2 | Stage III | T4 | MX | N0 | 25.50177 | Tumor  |
| TCGA-3A-A9I7-01A-21R-A38C-07 | 1323 | 0 | 45 | MALE   | G2 | Stage IIB | T3 | MX | N1 | 38.13324 | Tumor  |

|                              |      |   |    |        |    |           |    |    |     |          |       |
|------------------------------|------|---|----|--------|----|-----------|----|----|-----|----------|-------|
| TCGA-F2-A8YN-01A-11R-A37L-07 | 517  | 0 | 76 | MALE   | G2 | Stage IIA | T3 | M0 | N0  | 71.26064 | Tumor |
| TCGA-IB-7645-01A-22R-2204-07 | 1502 | 1 | 44 | FEMALE | G1 | Stage IIB | T3 | M0 | N1  | 53.61161 | Tumor |
| TCGA-IB-7890-01A-12R-2204-07 | 598  | 1 | 73 | MALE   | G3 | Stage IB  | T2 | M0 | N0  | 16.38162 | Tumor |
| TCGA-US-A776-01A-13R-A33R-07 | 844  | 0 | 61 | MALE   | G2 | Stage IIA | T3 | MX | N0  | 78.57818 | Tumor |
| TCGA-FB-A4P5-01A-11R-A26U-07 | 179  | 1 | 69 | FEMALE | G2 | Stage IIB | T3 | MX | N1  | 26.09446 | Tumor |
| TCGA-HZ-7926-01A-11R-2156-07 | 518  | 1 | 57 | MALE   | G1 | Stage IIB | T3 | MX | N1  | 89.05828 | Tumor |
| TCGA-IB-A6UF-01A-23R-A33R-07 | 666  | 0 | 63 | MALE   | G2 | Stage IIB | T3 | M0 | N1  | 98.14662 | Tumor |
| TCGA-HZ-7918-01A-11R-2156-07 | 969  | 0 | 72 | MALE   | G3 | Stage IIB | T3 | M0 | N1  | 34.43317 | Tumor |
| TCGA-3A-A9IH-01A-12R-A39D-07 | 1021 | 0 | 66 | FEMALE | G2 | Stage IA  | T1 | MX | N0  | 88.16779 | Tumor |
| TCGA-FB-A78T-01A-12R-A32O-07 | 375  | 1 | 71 | FEMALE | G2 | Stage IIB | T3 | M0 | N1  | 218.9075 | Tumor |
| TCGA-2L-AAQA-01A-21R-A38C-07 | 143  | 1 | 76 | MALE   | G2 | Stage IIB | T3 | MX | N1  | 224.1535 | Tumor |
| TCGA-2J-AABE-01A-12R-A41B-07 | 676  | 0 | 73 | MALE   | G2 | Stage IIA | T3 | M0 | N0  | 125.4138 | Tumor |
| TCGA-2L-AAQI-01A-12R-A39D-07 | 103  | 1 | 66 | MALE   | G3 | Stage IIB | T3 | MX | N1  | 113.4905 | Tumor |
| TCGA-IB-7651-01A-11R-2156-07 | 603  | 1 | 64 | FEMALE | G2 | Stage IIB | T3 | M0 | N1  | 20.63386 | Tumor |
| TCGA-3A-A9IX-01A-11R-A41B-07 | 1037 | 0 | 40 | MALE   | G2 | Stage IA  | T1 | MX | N0  | 47.84881 | Tumor |
| TCGA-F2-7273-01A-11R-2156-07 | 360  | 0 | 54 | MALE   | G3 | Stage IIB | T3 | M0 | N1  | 50.41872 | Tumor |
| TCGA-2J-AAB8-01A-12R-A41B-07 | 80   | 0 | 71 | MALE   | G3 | Stage IIB | T3 | M0 | N1  | 100.3159 | Tumor |
| TCGA-HZ-8636-01A-21R-2404-07 | 545  | 1 | 58 | FEMALE | G3 | Stage IV  | T3 | M1 | N0  | 42.60964 | Tumor |
| TCGA-YH-A8SY-01A-11R-A37L-07 | 388  | 0 | 73 | FEMALE | G2 | unknow    | T3 | MX | N1  | 62.63896 | Tumor |
| TCGA-F2-6880-01A-11R-2156-07 | 295  | 0 | 70 | MALE   | G1 | Stage IIB | T3 | M0 | N1  | 7.1136   | Tumor |
| TCGA-2J-AABO-01A-21R-A41B-07 | 440  | 0 | 43 | MALE   | G2 | Stage IIB | T3 | M0 | N1  | 51.71167 | Tumor |
| TCGA-IB-A6UG-01A-32R-A33R-07 | 41   | 1 | 65 | MALE   | G3 | Stage IIB | T3 | M0 | N1  | 77.45783 | Tumor |
| TCGA-2J-AABP-01A-11R-A41B-07 | 355  | 0 | 58 | FEMALE | G4 | Stage IIB | T3 | M0 | N1  | 0.298187 | Tumor |
| TCGA-US-A779-01A-11R-A32O-07 | 511  | 1 | 54 | FEMALE | G1 | Stage IIB | T3 | MX | N1b | 110.8355 | Tumor |
| TCGA-HZ-7920-01A-11R-2204-07 | 236  | 1 | 71 | MALE   | G2 | Stage IB  | T2 | MX | N0  | 20.24848 | Tumor |
| TCGA-FB-A545-01A-11R-A26U-07 | 385  | 0 | 72 | FEMALE | G2 | Stage IIB | T3 | M0 | N1  | 93.04457 | Tumor |
| TCGA-LB-A7SX-01A-11R-A33R-07 | 393  | 1 | 74 | FEMALE | G2 | Stage IIB | T3 | MX | N1  | 204.6916 | Tumor |
| TCGA-HV-A5A5-01A-11R-A26U-07 | 289  | 0 | 61 | FEMALE | G2 | Stage IIB | T3 | M0 | N1  | 72.70087 | Tumor |
| TCGA-HZ-8003-01A-21R-2204-07 | 596  | 1 | 65 | FEMALE | G2 | Stage IIB | T3 | MX | N1  | 12.36404 | Tumor |

|                              |      |   |    |        |    |           |    |    |     |          |        |
|------------------------------|------|---|----|--------|----|-----------|----|----|-----|----------|--------|
| TCGA-IB-AAUQ-01A-22R-A41I-07 | 183  | 1 | 50 | MALE   | G2 | Stage IIB | T3 | M0 | N1  | 66.34366 | Tumor  |
| TCGA-FB-AAQ1-01A-12R-A41B-07 | 123  | 1 | 49 | MALE   | G2 | Stage IIB | T3 | MX | N1  | 87.47355 | Tumor  |
| TCGA-HZ-8317-01A-11R-2404-07 | 378  | 1 | 69 | FEMALE | G1 | Stage IIB | T3 | MX | N1  | 48.22136 | Tumor  |
| TCGA-2J-AABA-01A-21R-A41B-07 | 607  | 1 | 55 | MALE   | G2 | Stage IIB | T3 | M0 | N1  | 83.66099 | Tumor  |
| TCGA-2J-AABV-01A-12R-A41B-07 | 652  | 1 | 74 | MALE   | G4 | Stage IIB | T3 | M0 | N1  | 17.26978 | Tumor  |
| TCGA-2L-AAQM-01A-11R-A39D-07 | 1383 | 0 | 52 | MALE   | G1 | Stage IIB | T3 | MX | N1  | 53.48154 | Tumor  |
| TCGA-H6-8124-11A-01R-2404-07 | 392  | 0 | 56 | FEMALE | G3 | Stage IIB | T3 | M0 | N1  | 63.38612 | Normal |
| TCGA-H6-8124-01A-11R-2404-07 | 392  | 0 | 56 | FEMALE | G3 | Stage IIB | T3 | M0 | N1  | 71.78085 | Tumor  |
| TCGA-XD-AAUG-01A-61R-A41B-07 | 420  | 0 | 66 | FEMALE | G2 | Stage IV  | T3 | M1 | N1  | 28.2238  | Tumor  |
| TCGA-IB-7887-01A-11R-2156-07 | 110  | 1 | 62 | FEMALE | G2 | Stage IIB | T3 | M0 | N1  | 50.00703 | Tumor  |
| TCGA-IB-7652-01A-11R-2156-07 | 724  | 0 | 49 | FEMALE | G2 | Stage IIB | T3 | M0 | N1  | 93.56102 | Tumor  |
| TCGA-IB-A5SQ-01A-11R-A32O-07 | 219  | 1 | 56 | FEMALE | G2 | Stage IB  | T2 | M0 | N0  | 18.02264 | Tumor  |
| TCGA-F2-7276-01A-11R-2156-07 | 216  | 1 | 64 | MALE   | G1 | Stage IIB | T3 | M0 | N1  | 46.10309 | Tumor  |
| TCGA-HZ-A4BK-01A-11R-A26U-07 | 657  | 0 | 72 | MALE   | G3 | Stage IIB | T3 | MX | N1  | 91.40266 | Tumor  |
| TCGA-3A-A9IZ-01A-12R-A41B-07 | 308  | 1 | 47 | MALE   | G2 | Stage IIB | T3 | MX | N1  | 103.1683 | Tumor  |
| TCGA-IB-7886-01A-11R-2156-07 | 123  | 1 | 80 | MALE   | G3 | Stage IIB | T3 | M0 | N1  | 127.985  | Tumor  |
| TCGA-IB-AAUV-01A-11R-A38C-07 | 404  | 0 | 49 | MALE   | G2 | Stage IIB | T3 | M0 | N1  | 6.922348 | Tumor  |
| TCGA-2J-AAB4-01A-12R-A41B-07 | 729  | 0 | 48 | MALE   | G2 | Stage IIB | T2 | M0 | N1  | 133.2309 | Tumor  |
| TCGA-US-A77J-01A-11R-A32O-07 | 568  | 1 | 81 | FEMALE | G2 | Stage IIB | T3 | MX | N1b | 66.50668 | Tumor  |
| TCGA-Q3-A5QY-01A-12R-A32O-07 | 416  | 0 | 58 | MALE   | G2 | Stage IIB | T3 | MX | N1  | 19.94472 | Tumor  |
| TCGA-IB-7646-01A-11R-2156-07 | 145  | 1 | 60 | MALE   | G2 | Stage IIB | T3 | M0 | N1  | 49.40269 | Tumor  |
| TCGA-HZ-A77O-01A-11R-A33R-07 | 160  | 1 | 77 | FEMALE | G2 | Stage IIB | T2 | MX | N1  | 31.13641 | Tumor  |
| TCGA-2J-AABK-01A-31R-A41B-07 | 484  | 0 | 71 | MALE   | G2 | Stage IIB | T3 | M0 | N1  | 174.2304 | Tumor  |
| TCGA-HV-A5A4-01A-11R-A26U-07 | 232  | 0 | 72 | FEMALE | G2 | Stage IIA | T3 | MX | N0  | 187.9665 | Tumor  |
| TCGA-2J-AAB6-01A-11R-A41B-07 | 293  | 1 | 75 | MALE   | G2 | Stage IIA | T3 | M0 | N0  | 48.79471 | Tumor  |
| TCGA-2J-AABT-01A-11R-A41B-07 | 319  | 0 | 72 | FEMALE | G2 | Stage IIB | T3 | M0 | N1  | 44.24031 | Tumor  |
| TCGA-HZ-A77Q-01A-11R-A36G-07 | 33   | 0 | 55 | FEMALE | G2 | Stage IIB | T3 | MX | N1  | 57.76599 | Tumor  |
| TCGA-IB-7893-01A-11R-2204-07 | 117  | 1 | 64 | MALE   | G3 | Stage IIA | T3 | M0 | N0  | 16.25033 | Tumor  |
| TCGA-3E-AAAY-01A-11R-A38C-07 | 2285 | 0 | 67 | MALE   | G3 | Stage IIB | T3 | MX | N1  | 97.24485 | Tumor  |

|                              |      |   |    |        |    |           |    |    |    |           |        |
|------------------------------|------|---|----|--------|----|-----------|----|----|----|-----------|--------|
| TCGA-HZ-7922-01A-11R-2156-07 | 4    | 0 | 61 | FEMALE | G1 | Stage IIB | T3 | MX | N1 | 44.46078  | Tumor  |
| TCGA-RB-A7B8-01A-12R-A33R-07 | 466  | 1 | 81 | FEMALE | G2 | Stage IIB | T3 | MX | N1 | 101.4903  | Tumor  |
| TCGA-HZ-7289-01A-11R-2156-07 | 661  | 1 | 77 | MALE   | G1 | Stage IIB | T3 | MX | N1 | 75.41798  | Tumor  |
| TCGA-YY-A8LH-01A-11R-A36G-07 | 2016 | 0 | 61 | FEMALE | G3 | Stage IIB | T3 | MX | N1 | 207.9416  | Tumor  |
| TCGA-HZ-7923-01A-12R-2156-07 | 314  | 0 | 65 | MALE   | G2 | Stage IIA | T3 | MX | N0 | 39.76472  | Tumor  |
| TCGA-H8-A6C1-01A-11R-A32O-07 | 671  | 0 | 53 | MALE   | G2 | Stage IIA | T3 | MX | N0 | 114.8778  | Tumor  |
| TCGA-US-A77G-01A-11R-A32O-07 | 12   | 1 | 64 | MALE   | G2 | Stage IIB | T3 | MX | N1 | 187.3444  | Tumor  |
| TCGA-3A-A9IC-01A-11R-A38C-07 | 738  | 1 | 61 | FEMALE | G2 | Stage IIB | T3 | MX | N1 | 94.19425  | Tumor  |
| TCGA-IB-A5ST-01A-11R-A32O-07 | 635  | 0 | 64 | FEMALE | G2 | Stage IIB | T3 | M0 | N1 | 35.36733  | Tumor  |
| TCGA-HZ-8637-01A-11R-2404-07 | 517  | 1 | 76 | FEMALE | G3 | Stage IIB | T3 | MX | N1 | 11.31888  | Tumor  |
| TCGA-IB-AAUW-01A-12R-A38C-07 | 230  | 1 | 63 | FEMALE | G3 | Stage IIB | T3 | M0 | N1 | 76.33277  | Tumor  |
| TCGA-3A-A9I9-01A-11R-A38C-07 | 634  | 1 | 67 | MALE   | G2 | Stage IIA | T3 | MX | N0 | 40.46128  | Tumor  |
| TCGA-2J-AABR-01A-11R-A41B-07 | 438  | 0 | 60 | FEMALE | G3 | Stage IIA | T3 | M0 | N0 | 99.86989  | Tumor  |
| TCGA-H6-A45N-11A-12R-A26U-07 | 397  | 1 | 88 | FEMALE | G3 | Stage IIB | T3 | MX | N1 | 0.1076535 | Normal |
| TCGA-H6-A45N-01A-11R-A26U-07 | 397  | 1 | 88 | FEMALE | G3 | Stage IIB | T3 | MX | N1 | 95.6977   | Tumor  |
| TCGA-FB-AAQ3-01A-11R-A41B-07 | 31   | 1 | 65 | FEMALE | G2 | Stage IIB | T3 | MX | N1 | 70.97887  | Tumor  |
| TCGA-HV-AA8X-01A-11R-A39D-07 | 532  | 1 | 75 | FEMALE | G2 | Stage IIB | T2 | MX | N1 | 171.0373  | Tumor  |
| TCGA-IB-8126-01A-11R-2404-07 | 75   | 0 | 79 | FEMALE | G1 | Stage III | T4 | M0 | N1 | 25.2237   | Tumor  |
| TCGA-HV-A7OP-01A-11R-A33R-07 | 978  | 0 | 72 | MALE   | GX | Stage IIB | T3 | M0 | N1 | 62.72917  | Tumor  |
| TCGA-HZ-A8P0-01A-11R-A36G-07 | 0    | 0 | 76 | MALE   | G1 | Stage IIB | T3 | MX | N1 | 70.39265  | Tumor  |
| TCGA-F2-6879-01A-11R-2156-07 | 334  | 1 | 57 | MALE   | G2 | Stage IIB | T3 | M0 | N1 | 67.21358  | Tumor  |
| TCGA-S4-A8RO-01A-12R-A37L-07 | 525  | 0 | 75 | FEMALE | G2 | Stage IIB | T3 | MX | N1 | 63.51164  | Tumor  |
| TCGA-HZ-A49H-01A-11R-A26U-07 | 491  | 0 | 68 | FEMALE | G2 | Stage IIB | T3 | MX | N1 | 55.06249  | Tumor  |
| TCGA-L1-A7W4-01A-12R-A36G-07 | 278  | 1 | 48 | FEMALE | G3 | Stage IIB | T3 | M0 | N1 | 69.69188  | Tumor  |
| TCGA-RL-AAAS-01A-32R-A39D-07 | 9    | 0 | 60 | FEMALE | G2 | Stage IB  | T2 | M0 | N0 | 55.25857  | Tumor  |
| TCGA-XN-A8T3-01A-11R-A36G-07 | 951  | 0 | 67 | MALE   | G2 | Stage IB  | T2 | M0 | N0 | 58.62657  | Tumor  |
| TCGA-IB-AAUN-01A-12R-A38C-07 | 144  | 1 | 74 | FEMALE | G2 | Stage IB  | T2 | M0 | N0 | 53.90334  | Tumor  |
| TCGA-HZ-8005-01A-11R-2204-07 | 120  | 1 | 81 | MALE   | G3 | Stage IIB | T3 | MX | N1 | 7.567889  | Tumor  |
| TCGA-XD-AAUL-01A-21R-A39D-07 | 405  | 0 | 56 | MALE   | G2 | Stage IIA | T3 | MX | N0 | 54.52769  | Tumor  |

|                              |      |   |    |        |    |           |    |    |     |          |       |
|------------------------------|------|---|----|--------|----|-----------|----|----|-----|----------|-------|
| TCGA-IB-AAUP-01A-11R-A37L-07 | 431  | 0 | 68 | MALE   | G2 | Stage IIB | T3 | M0 | N1  | 35.93006 | Tumor |
| TCGA-HV-A5A6-01A-11R-A26U-07 | 2036 | 1 | 65 | FEMALE | G1 | Stage IIB | T3 | M0 | N1b | 88.679   | Tumor |
| TCGA-HZ-8519-01A-11R-2404-07 | 454  | 0 | 73 | MALE   | G3 | Stage IA  | T1 | MX | N0  | 38.76402 | Tumor |
| TCGA-IB-7885-01A-11R-2156-07 | 977  | 0 | 78 | FEMALE | G2 | Stage IIB | T3 | M0 | N1  | 49.67984 | Tumor |
| TCGA-2L-AAQL-01A-11R-A38C-07 | 292  | 1 | 82 | MALE   | G3 | Stage IIB | T3 | MX | N1  | 270.6472 | Tumor |
| TCGA-IB-AAUT-01A-11R-A37L-07 | 287  | 0 | 65 | MALE   | G1 | Stage IIB | T2 | M0 | N1  | 79.1538  | Tumor |
| TCGA-IB-7644-01A-11R-2156-07 | 394  | 1 | 65 | FEMALE | G2 | Stage IV  | T3 | M1 | N1  | 115.4936 | Tumor |
| TCGA-IB-7889-01A-11R-2156-07 | 481  | 1 | 85 | FEMALE | G1 | Stage IIB | T3 | M0 | N1  | 78.65208 | Tumor |
| TCGA-2J-AAB1-01A-11R-A41B-07 | 66   | 1 | 65 | MALE   | G3 | Stage IIB | T3 | M0 | N1  | 97.30511 | Tumor |
| TCGA-HZ-7919-01A-11R-2156-07 | 593  | 1 | 52 | FEMALE | G2 | Stage IIB | T3 | M0 | N1  | 111.1395 | Tumor |

**Table S2: The detailed information of miR-1224-5p expression data and corresponding clinicopathological information based on TCGA database.**

| ID                           | type   | futime | fustat | age | gender | grade | stage     | T  | M  | N  | hsa-mir-1224-5p |
|------------------------------|--------|--------|--------|-----|--------|-------|-----------|----|----|----|-----------------|
| TCGA-HZ-A77P-01A-11R-A343-13 | Tumor  | 330    | 0      | 77  | MALE   | G1    | Stage IIB | T3 | MX | N1 | 32.76310662     |
| TCGA-IB-AAUR-01A-21R-A38N-13 | Tumor  | 338    | 0      | 67  | MALE   | G1    | Stage IIB | T3 | M0 | N1 | 62.17552459     |
| TCGA-3A-A9IV-01A-11R-A41G-13 | Tumor  | 1103   | 0      | 59  | FEMALE | G1    | Stage IB  | T2 | MX | N0 | 442.4620777     |
| TCGA-2J-AABH-01A-21R-A41G-13 | Tumor  | 677    | 0      | 61  | MALE   | G3    | Stage IIA | T3 | M0 | N0 | 65.77365008     |
| TCGA-F2-A44H-01A-11R-A26Y-13 | Tumor  | 586    | 0      | 65  | MALE   | G2    | Stage IIA | T3 | M0 | N0 | 26.06849884     |
| TCGA-HZ-7924-01A-11R-2155-13 | Tumor  | 840    | 0      | 60  | FEMALE | G2    | Stage IIA | T3 | MX | N0 | 23.1886151      |
| TCGA-HZ-A49G-01A-11R-A26Y-13 | Tumor  | 660    | 0      | 58  | FEMALE | G2    | Stage IIB | T2 | MX | N1 | 20.37745301     |
| TCGA-FB-AAQ2-01A-31R-A41G-13 | Tumor  | 153    | 1      | 81  | FEMALE | G3    | Stage IIB | T3 | MX | N1 | 156.9003602     |
| TCGA-2L-AAQE-01A-11R-A39J-13 | Tumor  | 684    | 1      | 56  | MALE   | G2    | Stage IIB | T3 | M0 | N1 | 7.606675925     |
| TCGA-IB-AAUM-01A-11R-A37H-13 | Tumor  | 8      | 0      | 76  | MALE   | G3    | Stage IIB | T2 | M0 | N1 | 22.56214128     |
| TCGA-HZ-A49I-01A-12R-A26Y-13 | Tumor  | 308    | 1      | 77  | MALE   | G2    | Stage IIB | T3 | MX | N1 | 25.65736803     |
| TCGA-FB-A4P6-01A-12R-A26Y-13 | Tumor  | 363    | 0      | 54  | MALE   | G1    | Stage IIB | T3 | MX | N1 | 25.61500915     |
| TCGA-3A-A9IO-01A-11R-A38N-13 | Tumor  | 1942   | 0      | 55  | MALE   | G1    | unknow    | TX | MX | NX | 475.4023008     |
| TCGA-YB-A89D-11A-11R-A36B-13 | Normal | 350    | 0      | 59  | MALE   | G2    | Stage IIB | T3 | MX | N1 | 3.652432814     |
| TCGA-YB-A89D-01A-12R-A36B-13 | Tumor  | 350    | 0      | 59  | MALE   | G2    | Stage IIB | T3 | MX | N1 | 38.99280599     |



|                              |       |      |   |    |        |    |           |        |    |        |             |
|------------------------------|-------|------|---|----|--------|----|-----------|--------|----|--------|-------------|
| TCGA-HZ-7925-01A-11R-2155-13 | Tumor | 614  | 1 | 66 | MALE   | G2 | Stage IIB | T3     | MX | N1     | 17.662489   |
| TCGA-IB-7654-01A-11R-2155-13 | Tumor | 476  | 1 | 80 | MALE   | G2 | Stage IIB | T2     | M0 | N1     | 45.71202425 |
| TCGA-XN-A8T5-01A-12R-A36B-13 | Tumor | 720  | 0 | 53 | FEMALE | G2 | Stage IB  | T2     | M0 | N0     | 25.4342006  |
| TCGA-3A-A9IS-01A-21R-A39J-13 | Tumor | 998  | 0 | 67 | MALE   | G1 | Stage IB  | T2     | MX | N0     | 699.1848174 |
| TCGA-XD-AAUI-01A-42R-A41G-13 | Tumor | 366  | 1 | 50 | FEMALE | G2 | Stage IIB | T3     | MX | N1     | 35.64930505 |
| TCGA-HV-A7OL-01A-11R-A343-13 | Tumor | 252  | 0 | 70 | MALE   | G2 | Stage IIA | T3     | MX | N0     | 5.687412532 |
| TCGA-HZ-8002-01A-11R-2203-13 | Tumor | 366  | 1 | 61 | MALE   | G2 | Stage IIB | T3     | MX | N1     | 38.13759766 |
| TCGA-3A-A9IL-01A-11R-A38N-13 | Tumor | 2741 | 0 | 39 | FEMALE | G1 | Stage I   | T1     | MX | unknow | 1824.777572 |
| TCGA-3A-A9J0-01A-11R-A41G-13 | Tumor | 743  | 0 | 75 | MALE   | G2 | Stage IIB | T3     | MX | N1     | 1.755847557 |
| TCGA-OE-A75W-01A-12R-A32J-13 | Tumor | 267  | 1 | 75 | MALE   | G1 | Stage IIA | T3     | M0 | N0     | 3.580929753 |
| TCGA-2J-AABF-01A-31R-A41G-13 | Tumor | 691  | 1 | 73 | MALE   | G3 | Stage IIB | T3     | M0 | N1     | 93.59774597 |
| TCGA-FB-AAQ6-01A-11R-A41G-13 | Tumor | 244  | 1 | 85 | MALE   | G2 | Stage IA  | T1     | MX | N0     | 29.67256511 |
| TCGA-PZ-A5RE-01A-11R-A32J-13 | Tumor | 470  | 1 | 44 | FEMALE | G3 | Stage IIB | T3     | MX | N1     | 25.24866203 |
| TCGA-2J-AAB9-01A-11R-A41G-13 | Tumor | 627  | 1 | 70 | FEMALE | G1 | Stage IIB | T3     | M0 | N1     | 27.15552605 |
| TCGA-2L-AAQJ-01A-12R-A39J-13 | Tumor | 394  | 1 | 49 | FEMALE | G2 | Stage III | T4     | MX | N0     | 10.01179658 |
| TCGA-HZ-A4BH-01A-11R-A26Y-13 | Tumor | 194  | 0 | 75 | MALE   | G3 | Stage IIB | T3     | MX | N1b    | 55.43765962 |
| TCGA-FB-AAPU-01A-31R-A41G-13 | Tumor | 381  | 1 | 41 | FEMALE | G2 | Stage IIA | T3     | MX | N0     | 29.78536372 |
| TCGA-Z5-AAPL-01A-12R-A41G-13 | Tumor | 467  | 0 | 74 | FEMALE | G1 | Stage IIA | T3     | M0 | N0     | 3.877820543 |
| TCGA-FB-AAPQ-01A-11R-A41G-13 | Tumor | 1130 | 1 | 65 | MALE   | G2 | Stage IIB | T3     | MX | N1     | 106.7057607 |
| TCGA-HZ-A9TJ-06A-11R-A41G-13 | Tumor | 603  | 0 | 70 | MALE   | G2 | Stage IV  | T3     | M1 | N0     | 406.9982142 |
| TCGA-HZ-A9TJ-01A-11R-A41D-13 | Tumor | 603  | 0 | 70 | MALE   | G2 | Stage IV  | T3     | M1 | N0     | 15.62877489 |
| TCGA-IB-7897-01A-21R-2203-13 | Tumor | 486  | 1 | 53 | FEMALE | G2 | Stage IIB | T3     | M0 | N1     | 463.6887359 |
| TCGA-3A-A9I5-01A-11R-A38N-13 | Tumor | 1794 | 0 | 57 | MALE   | G1 | unknow    | unknow | MX | N0     | 94.41158242 |
| TCGA-HZ-8315-01A-11R-2401-13 | Tumor | 299  | 1 | 54 | FEMALE | G2 | Stage IIA | T3     | MX | N0     | 17.16481822 |
| TCGA-HZ-A8P1-01A-11R-A37H-13 | Tumor | 7    | 0 | 81 | MALE   | G1 | Stage IB  | T2     | MX | N0     | 15.89850116 |
| TCGA-IB-A7M4-01A-11R-A36B-13 | Tumor | 483  | 0 | 81 | MALE   | G3 | Stage IIB | T3     | MX | N1     | 7.304752452 |
| TCGA-IB-7647-01A-11R-2155-13 | Tumor | 666  | 1 | 41 | MALE   | G2 | Stage IIB | T3     | M0 | N1     | 155.4608817 |
| TCGA-FB-AAPZ-01A-11R-A41G-13 | Tumor | 716  | 0 | 54 | MALE   | G3 | Stage IIB | T2     | MX | N1     | 1.776009238 |
| TCGA-RB-AA9M-01A-11R-A39J-13 | Tumor | 286  | 0 | 43 | MALE   | G3 | Stage IIB | T1     | MX | N1     | 98.1945215  |

|                              |       |      |   |    |        |    |           |    |    |    |             |
|------------------------------|-------|------|---|----|--------|----|-----------|----|----|----|-------------|
| TCGA-LB-A8F3-01A-11R-A36B-13 | Tumor | 379  | 0 | 64 | FEMALE | G1 | Stage IIA | T3 | MX | N0 | 19.7986191  |
| TCGA-IB-A7LX-01A-12R-A36B-13 | Tumor | 250  | 1 | 57 | MALE   | G2 | Stage IIB | T3 | MX | N1 | 1.086869479 |
| TCGA-IB-7888-01A-11R-2155-13 | Tumor | 1332 | 1 | 66 | FEMALE | G2 | Stage IIA | T3 | M0 | N0 | 92.05808476 |
| TCGA-S4-A8RM-01A-11R-A37H-13 | Tumor | 646  | 0 | 67 | MALE   | G3 | Stage IIB | T3 | MX | N1 | 11.67820388 |
| TCGA-FB-AAPS-01A-12R-A39J-13 | Tumor | 228  | 0 | 62 | FEMALE | G2 | Stage IIB | T2 | MX | N1 | 16.44349448 |
| TCGA-IB-AAUO-01A-12R-A38N-13 | Tumor | 239  | 1 | 64 | FEMALE | G3 | Stage IIB | T3 | M0 | N1 | 23.37748008 |
| TCGA-3A-A9IB-01A-21R-A39J-13 | Tumor | 224  | 1 | 69 | FEMALE | G3 | Stage IIB | T3 | MX | N1 | 1.994108922 |
| TCGA-FB-AAPP-01A-12R-A41G-13 | Tumor | 485  | 1 | 71 | MALE   | G3 | Stage IIB | T3 | MX | N1 | 9.351879407 |
| TCGA-F2-A7TX-01A-33R-A38N-13 | Tumor | 95   | 1 | 77 | MALE   | G3 | Stage IIB | T3 | M0 | N1 | 39.43386    |
| TCGA-Q3-AA2A-01A-11R-A37H-13 | Tumor | 95   | 0 | 64 | FEMALE | G1 | Stage IB  | T3 | MX | N1 | 1.134552664 |
| TCGA-LB-A9Q5-01A-11R-A39J-13 | Tumor | 313  | 1 | 63 | FEMALE | G3 | Stage IIB | T3 | MX | N1 | 15.29399063 |
| TCGA-XD-AAUH-01A-42R-A41G-13 | Tumor | 395  | 0 | 57 | FEMALE | G2 | Stage IIB | T3 | M0 | N1 | 424.4863232 |
| TCGA-IB-7649-01A-11R-2155-13 | Tumor | 467  | 1 | 73 | FEMALE | G2 | Stage IIB | T3 | M0 | N1 | 36.5404434  |
| TCGA-IB-A5SO-01A-11R-A32J-13 | Tumor | 365  | 1 | 71 | MALE   | G2 | Stage IIB | T3 | M0 | N1 | 32.31501901 |
| TCGA-3A-A9IJ-01A-11R-A39J-13 | Tumor | 1854 | 0 | 65 | MALE   | G1 | Stage IB  | T2 | MX | N0 | 433.5786064 |
| TCGA-FB-A5VM-01A-11R-A32J-13 | Tumor | 449  | 0 | 74 | MALE   | G3 | Stage IB  | T2 | M0 | N0 | 43.92675416 |
| TCGA-IB-8127-01A-11R-2401-13 | Tumor | 522  | 0 | 59 | MALE   | G2 | Stage IIB | T3 | M0 | N1 | 20.93103208 |
| TCGA-3E-AAAZ-01A-11R-A38N-13 | Tumor | 2182 | 1 | 71 | MALE   | G2 | Stage IIA | T3 | MX | N0 | 7.709191429 |
| TCGA-2J-AABU-01A-11R-A41G-13 | Tumor | 277  | 1 | 56 | MALE   | G3 | Stage IIB | T3 | M0 | N1 | 3.938724514 |
| TCGA-HV-AA8V-01A-11R-A41G-13 | Tumor | 920  | 0 | 50 | MALE   | G3 | Stage IIB | T3 | MX | N1 | 22.72282005 |
| TCGA-IB-AAUU-01A-11R-A37H-13 | Tumor | 245  | 0 | 35 | MALE   | G3 | Stage IIB | T3 | M0 | N1 | 37.38862827 |
| TCGA-IB-A5SS-01A-11R-A32J-13 | Tumor | 460  | 1 | 64 | FEMALE | G3 | Stage IIB | T3 | M0 | N1 | 11.58885309 |
| TCGA-3A-A9IU-01A-11R-A39J-13 | Tumor | 458  | 1 | 65 | MALE   | G3 | Stage IIB | T3 | MX | N1 | 6.4184147   |
| TCGA-3A-A9IN-01A-11R-A39J-13 | Tumor | 2084 | 0 | 62 | FEMALE | G2 | Stage IB  | T2 | MX | NX | 304.2062981 |
| TCGA-FB-AAQ0-01A-31R-A41G-13 | Tumor | 473  | 1 | 68 | MALE   | G3 | Stage IIA | T3 | MX | N0 | 8.283885451 |
| TCGA-3A-A9IR-01A-11R-A38N-13 | Tumor | 1542 | 0 | 64 | FEMALE | G1 | Stage IB  | T2 | MX | N0 | 1897.931948 |
| TCGA-IB-7891-01A-11R-2203-13 | Tumor | 648  | 0 | 49 | FEMALE | G1 | Stage IIB | T3 | M0 | N1 | 107.4065439 |
| TCGA-2J-AABI-01A-12R-A41G-13 | Tumor | 969  | 0 | 55 | FEMALE | G3 | Stage IIA | T3 | M0 | N0 | 2.898385547 |
| TCGA-IB-AAUS-01A-12R-A38N-13 | Tumor | 225  | 0 | 84 | FEMALE | G2 | Stage IIB | T3 | M0 | N1 | 11.80310065 |

|                              |        |      |   |    |        |    |           |    |    |    |             |
|------------------------------|--------|------|---|----|--------|----|-----------|----|----|----|-------------|
| TCGA-FB-AAPY-01A-11R-A41G-13 | Tumor  | 1059 | 1 | 71 | MALE   | G2 | Stage IIB | T2 | MX | N1 | 37.41610539 |
| TCGA-F2-A44G-01A-11R-A26Y-13 | Tumor  | 233  | 1 | 79 | FEMALE | G2 | Stage IIB | T3 | M0 | N1 | 7.324042761 |
| TCGA-HV-A5A3-11A-11R-A26Y-13 | Normal | 128  | 1 | 50 | MALE   | G2 | Stage IIA | T3 | MX | NX | 2.87776677  |
| TCGA-HV-A5A3-01A-11R-A26Y-13 | Tumor  | 128  | 1 | 50 | MALE   | G2 | Stage IIA | T3 | MX | NX | 1.112321969 |
| TCGA-US-A774-01A-21R-A32J-13 | Tumor  | 695  | 1 | 76 | FEMALE | G3 | Stage IIB | T3 | MX | N1 | 9.051554009 |
| TCGA-IB-A5SP-01A-11R-A32J-13 | Tumor  | 482  | 0 | 77 | MALE   | G2 | Stage IIA | T3 | M0 | N0 | 21.47387751 |
| TCGA-US-A77E-01A-11R-A32J-13 | Tumor  | 430  | 1 | 73 | MALE   | G3 | Stage IIB | T3 | MX | N1 | 8.227604255 |
| TCGA-S4-A8RP-01A-11R-A36B-13 | Tumor  | 702  | 1 | 77 | FEMALE | G3 | Stage IIB | T3 | MX | N1 | 53.84533782 |
| TCGA-M8-A5N4-01A-11R-A26Y-13 | Tumor  | 584  | 0 | 48 | FEMALE | G2 | Stage IIA | T3 | M0 | N0 | 0.159360861 |
| TCGA-HZ-8001-01A-11R-2203-13 | Tumor  | 706  | 0 | 69 | MALE   | G2 | Stage III | T4 | MX | N0 | 201.5132524 |
| TCGA-3A-A9I7-01A-21R-A38N-13 | Tumor  | 1323 | 0 | 45 | MALE   | G2 | Stage IIB | T3 | MX | N1 | 19.91229484 |
| TCGA-F2-A8YN-01A-11R-A37H-13 | Tumor  | 517  | 0 | 76 | MALE   | G2 | Stage IIA | T3 | M0 | N0 | 0.26155392  |
| TCGA-IB-7645-01A-22R-2203-13 | Tumor  | 1502 | 1 | 44 | FEMALE | G1 | Stage IIB | T3 | M0 | N1 | 101.4400015 |
| TCGA-IB-7890-01A-12R-2203-13 | Tumor  | 598  | 1 | 73 | MALE   | G3 | Stage IB  | T2 | M0 | N0 | 125.2109427 |
| TCGA-FB-A4P5-01A-11R-A26Y-13 | Tumor  | 179  | 1 | 69 | FEMALE | G2 | Stage IIB | T3 | MX | N1 | 52.68652491 |
| TCGA-HZ-7926-01A-11R-2155-13 | Tumor  | 518  | 1 | 57 | MALE   | G1 | Stage IIB | T3 | MX | N1 | 3.631245494 |
| TCGA-IB-A6UF-01A-23R-A343-13 | Tumor  | 666  | 0 | 63 | MALE   | G2 | Stage IIB | T3 | M0 | N1 | 7.048796042 |
| TCGA-HZ-7918-01A-11R-2155-13 | Tumor  | 969  | 0 | 72 | MALE   | G3 | Stage IIB | T3 | M0 | N1 | 70.05613169 |
| TCGA-3A-A9IH-01A-12R-A39J-13 | Tumor  | 1021 | 0 | 66 | FEMALE | G2 | Stage IA  | T1 | MX | N0 | 67.20461692 |
| TCGA-FB-A78T-01A-12R-A32J-13 | Tumor  | 375  | 1 | 71 | FEMALE | G2 | Stage IIB | T3 | M0 | N1 | 7.041383316 |
| TCGA-2L-AAQA-01A-21R-A38N-13 | Tumor  | 143  | 1 | 76 | MALE   | G2 | Stage IIB | T3 | MX | N1 | 4.70092433  |
| TCGA-2J-AABE-01A-12R-A41G-13 | Tumor  | 676  | 0 | 73 | MALE   | G2 | Stage IIA | T3 | M0 | N0 | 17.46766661 |
| TCGA-2L-AAQI-01A-12R-A39J-13 | Tumor  | 103  | 1 | 66 | MALE   | G3 | Stage IIB | T3 | MX | N1 | 66.03490126 |
| TCGA-IB-7651-01A-11R-2155-13 | Tumor  | 603  | 1 | 64 | FEMALE | G2 | Stage IIB | T3 | M0 | N1 | 21.58851091 |
| TCGA-3A-A9IX-01A-11R-A41G-13 | Tumor  | 1037 | 0 | 40 | MALE   | G2 | Stage IA  | T1 | MX | N0 | 61.38682471 |
| TCGA-F2-7273-01A-11R-2155-13 | Tumor  | 360  | 0 | 54 | MALE   | G3 | Stage IIB | T3 | M0 | N1 | 93.92667308 |
| TCGA-2J-AAB8-01A-12R-A41G-13 | Tumor  | 80   | 0 | 71 | MALE   | G3 | Stage IIB | T3 | M0 | N1 | 0           |
| TCGA-HZ-8636-01A-21R-2401-13 | Tumor  | 545  | 1 | 58 | FEMALE | G3 | Stage IV  | T3 | M1 | N0 | 65.40130108 |
| TCGA-YH-A8SY-01A-11R-A37H-13 | Tumor  | 388  | 0 | 73 | FEMALE | G2 | unknow    | T3 | MX | N1 | 4.195411419 |

|                              |        |      |   |    |        |    |           |    |    |     |             |
|------------------------------|--------|------|---|----|--------|----|-----------|----|----|-----|-------------|
| TCGA-F2-6880-01A-11R-2155-13 | Tumor  | 295  | 0 | 70 | MALE   | G1 | Stage IIB | T3 | M0 | N1  | 42.6357857  |
| TCGA-2J-AABO-01A-21R-A41G-13 | Tumor  | 440  | 0 | 43 | MALE   | G2 | Stage IIB | T3 | M0 | N1  | 63.02489942 |
| TCGA-IB-A6UG-01A-32R-A343-13 | Tumor  | 41   | 1 | 65 | MALE   | G3 | Stage IIB | T3 | M0 | N1  | 7.588677638 |
| TCGA-US-A779-01A-11R-A32J-13 | Tumor  | 511  | 1 | 54 | FEMALE | G1 | Stage IIB | T3 | MX | N1b | 26.15082727 |
| TCGA-HZ-7920-01A-11R-2203-13 | Tumor  | 236  | 1 | 71 | MALE   | G2 | Stage IB  | T2 | MX | N0  | 275.3167624 |
| TCGA-FB-A545-01A-11R-A26Y-13 | Tumor  | 385  | 0 | 72 | FEMALE | G2 | Stage IIB | T3 | M0 | N1  | 4.095693166 |
| TCGA-LB-A7SX-01A-11R-A343-13 | Tumor  | 393  | 1 | 74 | FEMALE | G2 | Stage IIB | T3 | MX | N1  | 10.76353479 |
| TCGA-HV-A5A5-01A-11R-A26Y-13 | Tumor  | 289  | 0 | 61 | FEMALE | G2 | Stage IIB | T3 | M0 | N1  | 75.07800153 |
| TCGA-HZ-8003-01A-21R-2203-13 | Tumor  | 596  | 1 | 65 | FEMALE | G2 | Stage IIB | T3 | MX | N1  | 172.0377779 |
| TCGA-IB-AAUQ-01A-22R-A41D-13 | Tumor  | 183  | 1 | 50 | MALE   | G2 | Stage IIB | T3 | M0 | N1  | 77.47944347 |
| TCGA-FB-AAQ1-01A-12R-A41G-13 | Tumor  | 123  | 1 | 49 | MALE   | G2 | Stage IIB | T3 | MX | N1  | 10.71618244 |
| TCGA-HZ-8317-01A-11R-2401-13 | Tumor  | 378  | 1 | 69 | FEMALE | G1 | Stage IIB | T3 | MX | N1  | 2.632015618 |
| TCGA-2J-AABA-01A-21R-A41G-13 | Tumor  | 607  | 1 | 55 | MALE   | G2 | Stage IIB | T3 | M0 | N1  | 3.050547823 |
| TCGA-2J-AABV-01A-12R-A41G-13 | Tumor  | 652  | 1 | 74 | MALE   | G4 | Stage IIB | T3 | M0 | N1  | 25.13839381 |
| TCGA-2L-AAQM-01A-11R-A39J-13 | Tumor  | 1383 | 0 | 52 | MALE   | G1 | Stage IIB | T3 | MX | N1  | 193.2557644 |
| TCGA-H6-8124-11A-01R-2401-13 | Normal | 392  | 0 | 56 | FEMALE | G3 | Stage IIB | T3 | M0 | N1  | 40.75117565 |
| TCGA-H6-8124-01A-11R-2401-13 | Tumor  | 392  | 0 | 56 | FEMALE | G3 | Stage IIB | T3 | M0 | N1  | 52.31719164 |
| TCGA-XD-AAUG-01A-61R-A41G-13 | Tumor  | 420  | 0 | 66 | FEMALE | G2 | Stage IV  | T3 | M1 | N1  | 154.1283284 |
| TCGA-IB-7887-01A-11R-2155-13 | Tumor  | 110  | 1 | 62 | FEMALE | G2 | Stage IIB | T3 | M0 | N1  | 20.83799384 |
| TCGA-IB-7652-01A-11R-2155-13 | Tumor  | 724  | 0 | 49 | FEMALE | G2 | Stage IIB | T3 | M0 | N1  | 71.16158737 |
| TCGA-IB-A5SQ-01A-11R-A32J-13 | Tumor  | 219  | 1 | 56 | FEMALE | G2 | Stage IB  | T2 | M0 | N0  | 296.2934841 |
| TCGA-F2-7276-01A-11R-2155-13 | Tumor  | 216  | 1 | 64 | MALE   | G1 | Stage IIB | T3 | M0 | N1  | 95.48013274 |
| TCGA-HZ-A4BK-01A-11R-A26Y-13 | Tumor  | 657  | 0 | 72 | MALE   | G3 | Stage IIB | T3 | MX | N1  | 7.813179702 |
| TCGA-3A-A9IZ-01A-12R-A41G-13 | Tumor  | 308  | 1 | 47 | MALE   | G2 | Stage IIB | T3 | MX | N1  | 3.091420625 |
| TCGA-IB-7886-01A-11R-2155-13 | Tumor  | 123  | 1 | 80 | MALE   | G3 | Stage IIB | T3 | M0 | N1  | 0.07946156  |
| TCGA-IB-AAUV-01A-11R-A38N-13 | Tumor  | 404  | 0 | 49 | MALE   | G2 | Stage IIB | T3 | M0 | N1  | 106.4366254 |
| TCGA-2J-AAB4-01A-12R-A41G-13 | Tumor  | 729  | 0 | 48 | MALE   | G2 | Stage IIB | T2 | M0 | N1  | 44.23230249 |
| TCGA-US-A77J-01A-11R-A32J-13 | Tumor  | 568  | 1 | 81 | FEMALE | G2 | Stage IIB | T3 | MX | N1b | 38.84958533 |
| TCGA-Q3-A5QY-01A-12R-A32J-13 | Tumor  | 416  | 0 | 58 | MALE   | G2 | Stage IIB | T3 | MX | N1  | 1.869533751 |

|                              |        |      |   |    |        |    |           |    |    |    |             |
|------------------------------|--------|------|---|----|--------|----|-----------|----|----|----|-------------|
| TCGA-IB-7646-01A-11R-2155-13 | Tumor  | 145  | 1 | 60 | MALE   | G2 | Stage IIB | T3 | M0 | N1 | 89.09362125 |
| TCGA-HZ-A77O-01A-11R-A343-13 | Tumor  | 160  | 1 | 77 | FEMALE | G2 | Stage IIB | T2 | MX | N1 | 10.34350978 |
| TCGA-2J-AABK-01A-31R-A41G-13 | Tumor  | 484  | 0 | 71 | MALE   | G2 | Stage IIB | T3 | M0 | N1 | 165.4771755 |
| TCGA-HV-A5A4-01A-11R-A26Y-13 | Tumor  | 232  | 0 | 72 | FEMALE | G2 | Stage IIA | T3 | MX | N0 | 38.31996552 |
| TCGA-2J-AAB6-01A-11R-A41G-13 | Tumor  | 293  | 1 | 75 | MALE   | G2 | Stage IIA | T3 | M0 | N0 | 96.36551465 |
| TCGA-2J-AABT-01A-11R-A41G-13 | Tumor  | 319  | 0 | 72 | FEMALE | G2 | Stage IIB | T3 | M0 | N1 | 1.894689861 |
| TCGA-HZ-A77Q-01A-11R-A36B-13 | Tumor  | 33   | 0 | 55 | FEMALE | G2 | Stage IIB | T3 | MX | N1 | 0           |
| TCGA-IB-7893-01A-11R-2203-13 | Tumor  | 117  | 1 | 64 | MALE   | G3 | Stage IIA | T3 | M0 | N0 | 5.76678286  |
| TCGA-3E-AAAY-01A-11R-A38N-13 | Tumor  | 2285 | 0 | 67 | MALE   | G3 | Stage IIB | T3 | MX | N1 | 111.4851074 |
| TCGA-HZ-7922-01A-11R-2155-13 | Tumor  | 4    | 0 | 61 | FEMALE | G1 | Stage IIB | T3 | MX | N1 | 30.07561128 |
| TCGA-RB-A7B8-01A-12R-A343-13 | Tumor  | 466  | 1 | 81 | FEMALE | G2 | Stage IIB | T3 | MX | N1 | 17.80622082 |
| TCGA-HZ-7289-01A-11R-2155-13 | Tumor  | 661  | 1 | 77 | MALE   | G1 | Stage IIB | T3 | MX | N1 | 4.714740951 |
| TCGA-YY-A8LH-01A-11R-A36B-13 | Tumor  | 2016 | 0 | 61 | FEMALE | G3 | Stage IIB | T3 | MX | N1 | 33.98734499 |
| TCGA-HZ-7923-01A-12R-2155-13 | Tumor  | 314  | 0 | 65 | MALE   | G2 | Stage IIA | T3 | MX | N0 | 222.4393272 |
| TCGA-H8-A6C1-01A-11R-A32J-13 | Tumor  | 671  | 0 | 53 | MALE   | G2 | Stage IIA | T3 | MX | N0 | 11.59316234 |
| TCGA-US-A77G-01A-11R-A32J-13 | Tumor  | 12   | 1 | 64 | MALE   | G2 | Stage IIB | T3 | MX | N1 | 16.4509393  |
| TCGA-3A-A9IC-01A-11R-A38N-13 | Tumor  | 738  | 1 | 61 | FEMALE | G2 | Stage IIB | T3 | MX | N1 | 2.867112294 |
| TCGA-IB-A5ST-01A-11R-A32J-13 | Tumor  | 635  | 0 | 64 | FEMALE | G2 | Stage IIB | T3 | M0 | N1 | 0.190914996 |
| TCGA-HZ-8637-01A-11R-2401-13 | Tumor  | 517  | 1 | 76 | FEMALE | G3 | Stage IIB | T3 | MX | N1 | 115.518263  |
| TCGA-IB-AAUW-01A-12R-A38N-13 | Tumor  | 230  | 1 | 63 | FEMALE | G3 | Stage IIB | T3 | M0 | N1 | 49.18799731 |
| TCGA-3A-A9I9-01A-11R-A38N-13 | Tumor  | 634  | 1 | 67 | MALE   | G2 | Stage IIA | T3 | MX | N0 | 44.89528082 |
| TCGA-2J-AABR-01A-11R-A41G-13 | Tumor  | 438  | 0 | 60 | FEMALE | G3 | Stage IIA | T3 | M0 | N0 | 30.56141583 |
| TCGA-H6-A45N-11A-12R-A26Y-13 | Normal | 397  | 1 | 88 | FEMALE | G3 | Stage IIB | T3 | MX | N1 | 1.876272423 |
| TCGA-H6-A45N-01A-11R-A26Y-13 | Tumor  | 397  | 1 | 88 | FEMALE | G3 | Stage IIB | T3 | MX | N1 | 118.167628  |
| TCGA-FB-AAQ3-01A-11R-A41G-13 | Tumor  | 31   | 1 | 65 | FEMALE | G2 | Stage IIB | T3 | MX | N1 | 6.838530698 |
| TCGA-HV-AA8X-01A-11R-A39J-13 | Tumor  | 532  | 1 | 75 | FEMALE | G2 | Stage IIB | T2 | MX | N1 | 22.83917398 |
| TCGA-IB-8126-01A-11R-2401-13 | Tumor  | 75   | 0 | 79 | FEMALE | G1 | Stage III | T4 | M0 | N1 | 75.64812233 |
| TCGA-HV-A7OP-01A-11R-A343-13 | Tumor  | 978  | 0 | 72 | MALE   | GX | Stage IIB | T3 | M0 | N1 | 0.6182208   |
| TCGA-HZ-A8P0-01A-11R-A36B-13 | Tumor  | 0    | 0 | 76 | MALE   | G1 | Stage IIB | T3 | MX | N1 | 3.356893582 |

|                              |       |      |   |    |        |    |           |    |    |     |             |
|------------------------------|-------|------|---|----|--------|----|-----------|----|----|-----|-------------|
| TCGA-F2-6879-01A-11R-2155-13 | Tumor | 334  | 1 | 57 | MALE   | G2 | Stage IIB | T3 | M0 | N1  | 0.053554754 |
| TCGA-S4-A8RO-01A-12R-A37H-13 | Tumor | 525  | 0 | 75 | FEMALE | G2 | Stage IIB | T3 | MX | N1  | 33.26173683 |
| TCGA-HZ-A49H-01A-11R-A26Y-13 | Tumor | 491  | 0 | 68 | FEMALE | G2 | Stage IIB | T3 | MX | N1  | 107.0221726 |
| TCGA-L1-A7W4-01A-12R-A36B-13 | Tumor | 278  | 1 | 48 | FEMALE | G3 | Stage IIB | T3 | M0 | N1  | 6.014223619 |
| TCGA-RL-AAAS-01A-32R-A39J-13 | Tumor | 9    | 0 | 60 | FEMALE | G2 | Stage IB  | T2 | M0 | N0  | 21.86859673 |
| TCGA-XN-A8T3-01A-11R-A36B-13 | Tumor | 951  | 0 | 67 | MALE   | G2 | Stage IB  | T2 | M0 | N0  | 29.00348464 |
| TCGA-IB-AAUN-01A-12R-A38N-13 | Tumor | 144  | 1 | 74 | FEMALE | G2 | Stage IB  | T2 | M0 | N0  | 14.65159655 |
| TCGA-HZ-8005-01A-11R-2203-13 | Tumor | 120  | 1 | 81 | MALE   | G3 | Stage IIB | T3 | MX | N1  | 6.846537121 |
| TCGA-XD-AAUL-01A-21R-A39J-13 | Tumor | 405  | 0 | 56 | MALE   | G2 | Stage IIA | T3 | MX | N0  | 14.8361253  |
| TCGA-IB-AAUP-01A-11R-A37H-13 | Tumor | 431  | 0 | 68 | MALE   | G2 | Stage IIB | T3 | M0 | N1  | 19.00369786 |
| TCGA-HV-A5A6-01A-11R-A26Y-13 | Tumor | 2036 | 1 | 65 | FEMALE | G1 | Stage IIB | T3 | M0 | N1b | 4.600067946 |
| TCGA-HZ-8519-01A-11R-2401-13 | Tumor | 454  | 0 | 73 | MALE   | G3 | Stage IA  | T1 | MX | N0  | 1135.338822 |
| TCGA-IB-7885-01A-11R-2155-13 | Tumor | 977  | 0 | 78 | FEMALE | G2 | Stage IIB | T3 | M0 | N1  | 6.88537977  |
| TCGA-2L-AAQL-01A-11R-A38N-13 | Tumor | 292  | 1 | 82 | MALE   | G3 | Stage IIB | T3 | MX | N1  | 139.7052267 |
| TCGA-IB-7644-01A-11R-2155-13 | Tumor | 394  | 1 | 65 | FEMALE | G2 | Stage IV  | T3 | M1 | N1  | 7.146087401 |
| TCGA-IB-7889-01A-11R-2155-13 | Tumor | 481  | 1 | 85 | FEMALE | G1 | Stage IIB | T3 | M0 | N1  | 29.13933408 |
| TCGA-HZ-7919-01A-11R-2155-13 | Tumor | 593  | 1 | 52 | FEMALE | G2 | Stage IIB | T3 | M0 | N1  | 59.13370885 |

**Table S3: The detailed information of primary antibodies used in this study.**

| <b>Antibody</b> | <b>Source</b>             | <b>Catalog</b> |
|-----------------|---------------------------|----------------|
| P-PI3K          | Absin                     | abs130868      |
| PI3K            | Cell Signaling Technology | 4257T          |
| AKT             | Cell Signaling Technology | 4685S          |
| P-AKT           | Cell Signaling Technology | 4060T          |
| HES1            | Cell Signaling Technology | 11988S         |
| ELF3            | Invitrogen                | PA5-89261      |
| SNAIL           | Invitrogen                | MA5-14801      |
| SLUG            | Invitrogen                | MA5-26385      |

|                     |             |            |
|---------------------|-------------|------------|
| GAPDH               | Proteintech | 60004-1-Ig |
| Beta Actin Antibody | Proteintech | 60008-1-Ig |
| E-Cadherin          | Proteintech | 20874-1-AP |
| N-Cadherin          | Proteintech | 22018-1-AP |
| NOTCH1              | Proteintech | 20687-1-AP |
| C-MYC               | Proteintech | 10828-1-AP |
| Vimentin            | Servicebio  | GB12192    |
| MMP9                | Servicebio  | GB12132    |
| VEGFA               | Wanleibio   | WL00009b   |
| Cyclin D1           | Wanleibio   | WL01435a   |

**Table S4: The detailed RT-PCR primers' sequences used in this study.**

| Target          | Application | Sequence                                                     |
|-----------------|-------------|--------------------------------------------------------------|
| ELF3            | qRT-PCR     | F:ATGGTTTTCGTGAAGCAAGAA                                      |
|                 |             | R:CAGTACTCTTTGCTCAGCTTTC                                     |
| hsa-mir-1224-5p | qRT-PCR     | F:CGCGGTGAGGACTCGGG                                          |
|                 |             | R:AGTGCAGGGTCCGAGGTATT                                       |
|                 |             | RT Primer:GTCGTATCCAGTGCAGGGTCCGAGGTATTCGCACTGGATACGACCCACCT |
| GAPDH           | qRT-PCR     | F:ACAACCTTTGGTATCGTGGAAGG                                    |
|                 |             | R:GCCATCACGCCACAGTTTC                                        |
| U6              | qRT-PCR     | F:CGCTTCGGCAGCACATATAC                                       |
|                 |             | R:TTCACGAATTTGCGTGTCATC                                      |

**Table S5: The raw data of correlation analysis between ELF3 and miR-1224-5p.**

|   | ID                           | ELF3    | mir-1224-5P |
|---|------------------------------|---------|-------------|
| 1 | TCGA-HZ-A77P-01A-11R-A33R-07 | 5.04073 | 5.034000256 |

|    |                              |         |             |
|----|------------------------------|---------|-------------|
| 2  | TCGA-IB-AAUR-01A-21R-A38C-07 | 5.26829 | 5.95827487  |
| 3  | TCGA-3A-A9IV-01A-11R-A41B-07 | 4.28066 | 8.789410001 |
| 4  | TCGA-2J-AABH-01A-21R-A41B-07 | 6.39566 | 6.039437829 |
| 5  | TCGA-F2-A44H-01A-11R-A26U-07 | 5.03594 | 4.704235602 |
| 6  | TCGA-HZ-7924-01A-11R-2156-07 | 5.89862 | 4.535344755 |
| 7  | TCGA-HZ-A49G-01A-11R-A26U-07 | 6.38707 | 4.348901834 |
| 8  | TCGA-FB-AAQ2-01A-31R-A41B-07 | 5.34792 | 7.293704854 |
| 9  | TCGA-2L-AAQE-01A-11R-A39D-07 | 6.88892 | 2.927266142 |
| 10 | TCGA-IB-AAUM-01A-11R-A37L-07 | 5.29242 | 4.495832089 |
| 11 | TCGA-HZ-A49I-01A-12R-A26U-07 | 7.29693 | 4.681301279 |
| 12 | TCGA-FB-A4P6-01A-12R-A26U-07 | 6.39307 | 4.678917502 |
| 13 | TCGA-3A-A9IO-01A-11R-A38C-07 | 1.41604 | 8.893005075 |
| 14 | TCGA-YB-A89D-01A-12R-A36G-07 | 6.33975 | 5.285136072 |
| 15 | TCGA-HZ-7925-01A-11R-2156-07 | 5.94418 | 4.142616757 |
| 16 | TCGA-IB-7654-01A-11R-2156-07 | 4.83439 | 5.514501802 |
| 17 | TCGA-XN-A8T5-01A-12R-A36G-07 | 4.11767 | 4.668697846 |
| 18 | TCGA-3A-A9IS-01A-21R-A39D-07 | 2.31495 | 9.449530047 |
| 19 | TCGA-XD-AAUI-01A-42R-A41B-07 | 6.00176 | 5.155802048 |
| 20 | TCGA-HV-A7OL-01A-11R-A33R-07 | 6.98612 | 2.507772453 |
| 21 | TCGA-HZ-8002-01A-11R-2204-07 | 5.48167 | 5.253142064 |
| 22 | TCGA-3A-A9IL-01A-11R-A38C-07 | 3.10099 | 10.8335049  |
| 23 | TCGA-3A-A9J0-01A-11R-A41B-07 | 6.12148 | 0.812167595 |
| 24 | TCGA-OE-A75W-01A-12R-A32O-07 | 7.04735 | 1.840334218 |
| 25 | TCGA-2J-AABF-01A-31R-A41B-07 | 6.47112 | 6.548401882 |
| 26 | TCGA-FB-AAQ6-01A-11R-A41B-07 | 7.24663 | 4.891057744 |
| 27 | TCGA-PZ-A5RE-01A-11R-A32O-07 | 6.78591 | 4.658135034 |
| 28 | TCGA-2J-AAB9-01A-11R-A41B-07 | 5.43092 | 4.763173906 |
| 29 | TCGA-2L-AAQJ-01A-12R-A39D-07 | 6.73277 | 3.323628979 |
| 30 | TCGA-HZ-A4BH-01A-11R-A26U-07 | 6.12794 | 5.792794448 |



|    |                              |         |             |
|----|------------------------------|---------|-------------|
| 31 | TCGA-FB-AAPU-01A-31R-A41B-07 | 7.80335 | 4.896531671 |
| 32 | TCGA-Z5-AAPL-01A-12R-A41B-07 | 4.92167 | 1.95524604  |
| 33 | TCGA-FB-AAPQ-01A-11R-A41B-07 | 7.02349 | 6.737494254 |
| 34 | TCGA-HZ-A9TJ-06A-11R-A41B-07 | 7.23964 | 8.668878654 |
| 35 | TCGA-HZ-A9TJ-06A-11R-A41B-07 | 7.23964 | 3.966132788 |
| 36 | TCGA-HZ-A9TJ-01A-11R-A41I-07 | 7.36387 | 8.668878654 |
| 37 | TCGA-HZ-A9TJ-01A-11R-A41I-07 | 7.36387 | 3.966132788 |
| 38 | TCGA-IB-7897-01A-21R-2204-07 | 3.52981 | 8.85701287  |
| 39 | TCGA-3A-A9I5-01A-11R-A38C-07 | 6.02263 | 6.560891955 |
| 40 | TCGA-HZ-8315-01A-11R-2404-07 | 6.86766 | 4.101382674 |
| 41 | TCGA-HZ-A8P1-01A-11R-A37L-07 | 7.32176 | 3.990818856 |
| 42 | TCGA-IB-A7M4-01A-11R-A36G-07 | 5.83366 | 2.868835383 |
| 43 | TCGA-FB-AAPZ-01A-11R-A41B-07 | 6.89316 | 0.828639086 |
| 44 | TCGA-RB-AA9M-01A-11R-A39D-07 | 6.78278 | 6.61757063  |
| 45 | TCGA-LB-A8F3-01A-11R-A36G-07 | 7.00755 | 4.307327905 |
| 46 | TCGA-IB-A7LX-01A-12R-A36G-07 | 6.79178 | 0.120178699 |
| 47 | TCGA-IB-7888-01A-11R-2156-07 | 5.37504 | 6.524472523 |
| 48 | TCGA-S4-A8RM-01A-11R-A37L-07 | 7.95711 | 3.545746498 |
| 49 | TCGA-FB-AAPS-01A-12R-A39D-07 | 3.99264 | 4.03944502  |
| 50 | TCGA-IB-AAUO-01A-12R-A38C-07 | 6.03329 | 4.547047521 |
| 51 | TCGA-3A-A9IB-01A-21R-A39D-07 | 5.72785 | 0.995744215 |
| 52 | TCGA-FB-AAPP-01A-12R-A41B-07 | 6.67036 | 3.225256326 |
| 53 | TCGA-F2-A7TX-01A-33R-A38C-07 | 5.12207 | 5.301363031 |
| 54 | TCGA-Q3-AA2A-01A-11R-A37L-07 | 7.31201 | 0.182123578 |
| 55 | TCGA-LB-A9Q5-01A-11R-A39D-07 | 4.73834 | 3.93489299  |
| 56 | TCGA-XD-AAUH-01A-42R-A41B-07 | 4.84147 | 8.729574261 |
| 57 | TCGA-IB-7649-01A-11R-2156-07 | 5.38705 | 5.191422235 |
| 58 | TCGA-IB-A5SO-01A-11R-A32O-07 | 6.2833  | 5.014132935 |
| 59 | TCGA-3A-A9IJ-01A-11R-A39D-07 | 1.41199 | 8.760149763 |

|    |                              |         |              |
|----|------------------------------|---------|--------------|
| 60 | TCGA-FB-A5VM-01A-11R-A32O-07 | 5.4024  | 5.457027994  |
| 61 | TCGA-IB-8127-01A-11R-2404-07 | 6.16046 | 4.387571546  |
| 62 | TCGA-3E-AAAZ-01A-11R-A38C-07 | 6.47896 | 2.946579552  |
| 63 | TCGA-2J-AABU-01A-11R-A41B-07 | 5.04297 | 1.977728514  |
| 64 | TCGA-HV-AA8V-01A-11R-A41B-07 | 5.40135 | 4.506069989  |
| 65 | TCGA-IB-AAUU-01A-11R-A37L-07 | 7.20226 | 5.224527637  |
| 66 | TCGA-IB-A5SS-01A-11R-A32O-07 | 5.6278  | 3.53466589   |
| 67 | TCGA-3A-A9IU-01A-11R-A39D-07 | 7.0979  | 2.682217007  |
| 68 | TCGA-3A-A9IN-01A-11R-A39D-07 | 2.54495 | 8.248906212  |
| 69 | TCGA-FB-AAQ0-01A-31R-A41B-07 | 7.67446 | 3.050307604  |
| 70 | TCGA-3A-A9IR-01A-11R-A38C-07 | 3.7097  | 10.89021255  |
| 71 | TCGA-IB-7891-01A-11R-2204-07 | 5.97761 | 6.746938084  |
| 72 | TCGA-2J-AABI-01A-12R-A41B-07 | 4.41408 | 1.535249517  |
| 73 | TCGA-IB-AAUS-01A-12R-A38C-07 | 4.76141 | 3.561093997  |
| 74 | TCGA-FB-AAPY-01A-11R-A41B-07 | 6.40065 | 5.225587492  |
| 75 | TCGA-F2-A44G-01A-11R-A26U-07 | 6.3     | 2.872640214  |
| 76 | TCGA-HV-A5A3-01A-11R-A26U-07 | 7.36002 | 0.153574446  |
| 77 | TCGA-US-A774-01A-21R-A32O-07 | 5.8416  | 3.178165501  |
| 78 | TCGA-IB-A5SP-01A-11R-A32O-07 | 6.95056 | 4.424510815  |
| 79 | TCGA-US-A77E-01A-11R-A32O-07 | 6.73448 | 3.040472402  |
| 80 | TCGA-S4-A8RP-01A-11R-A36G-07 | 6.88839 | 5.75074953   |
| 81 | TCGA-M8-A5N4-01A-11R-A26U-07 | 5.77032 | -2.649630748 |
| 82 | TCGA-HZ-8001-01A-11R-2204-07 | 4.67253 | 7.65473091   |
| 83 | TCGA-3A-A9I7-01A-21R-A38C-07 | 5.25298 | 4.315587592  |
| 84 | TCGA-F2-A8YN-01A-11R-A37L-07 | 6.15503 | -1.934819703 |
| 85 | TCGA-IB-7645-01A-22R-2204-07 | 5.74447 | 6.664482862  |
| 86 | TCGA-IB-7890-01A-12R-2204-07 | 4.03401 | 6.968216841  |
| 87 | TCGA-FB-A4P5-01A-11R-A26U-07 | 4.70567 | 5.719362121  |
| 88 | TCGA-HZ-7926-01A-11R-2156-07 | 6.47668 | 1.860464468  |

|     |                              |         |             |
|-----|------------------------------|---------|-------------|
| 89  | TCGA-IB-A6UF-01A-23R-A33R-07 | 6.61687 | 2.817376861 |
| 90  | TCGA-HZ-7918-01A-11R-2156-07 | 5.10573 | 6.130439424 |
| 91  | TCGA-3A-A9IH-01A-12R-A39D-07 | 6.46218 | 6.070488444 |
| 92  | TCGA-FB-A78T-01A-12R-A32O-07 | 7.77418 | 2.815858882 |
| 93  | TCGA-2L-AAQA-01A-21R-A38C-07 | 7.80834 | 2.232944458 |
| 94  | TCGA-2J-AABE-01A-12R-A41B-07 | 6.97055 | 4.126614996 |
| 95  | TCGA-2L-AAQI-01A-12R-A39D-07 | 6.82643 | 6.045156825 |
| 96  | TCGA-IB-7651-01A-11R-2156-07 | 4.36694 | 4.43219183  |
| 97  | TCGA-3A-A9IX-01A-11R-A41B-07 | 5.58041 | 5.939857142 |
| 98  | TCGA-F2-7273-01A-11R-2156-07 | 5.65589 | 6.553463004 |
| 99  | TCGA-2J-AAB8-01A-12R-A41B-07 | 6.64841 | 0           |
| 100 | TCGA-HZ-8636-01A-21R-2404-07 | 5.41311 | 6.031247432 |
| 101 | TCGA-YH-A8SY-01A-11R-A37L-07 | 5.96899 | 2.068812294 |
| 102 | TCGA-F2-6880-01A-11R-2156-07 | 2.83058 | 5.413992938 |
| 103 | TCGA-2J-AABO-01A-21R-A41B-07 | 5.69242 | 5.977850006 |
| 104 | TCGA-IB-A6UG-01A-32R-A33R-07 | 6.27534 | 2.923848511 |
| 105 | TCGA-US-A779-01A-11R-A32O-07 | 6.79228 | 4.708784681 |
| 106 | TCGA-HZ-7920-01A-11R-2204-07 | 4.33974 | 8.10494864  |
| 107 | TCGA-FB-A545-01A-11R-A26U-07 | 6.53985 | 2.034107638 |
| 108 | TCGA-LB-A7SX-01A-11R-A33R-07 | 7.67731 | 3.428080038 |
| 109 | TCGA-HV-A5A5-01A-11R-A26U-07 | 6.1839  | 6.230318343 |
| 110 | TCGA-HZ-8003-01A-21R-2204-07 | 3.62808 | 7.426581592 |
| 111 | TCGA-IB-AAUQ-01A-22R-A41I-07 | 6.05189 | 6.275741686 |
| 112 | TCGA-FB-AAQ1-01A-12R-A41B-07 | 6.45077 | 3.421719143 |
| 113 | TCGA-HZ-8317-01A-11R-2404-07 | 5.5916  | 1.39616805  |
| 114 | TCGA-2J-AABA-01A-21R-A41B-07 | 6.38648 | 1.609068348 |
| 115 | TCGA-2J-AABV-01A-12R-A41B-07 | 4.11018 | 4.651820568 |
| 116 | TCGA-2L-AAQM-01A-11R-A39D-07 | 5.74097 | 7.594367637 |
| 117 | TCGA-H6-8124-01A-11R-2404-07 | 6.16553 | 5.709213195 |

|     |                              |         |              |
|-----|------------------------------|---------|--------------|
| 118 | TCGA-XD-AAUG-01A-61R-A41B-07 | 4.81884 | 7.26798824   |
| 119 | TCGA-IB-7887-01A-11R-2156-07 | 5.64406 | 4.381144485  |
| 120 | TCGA-IB-7652-01A-11R-2156-07 | 6.54784 | 6.153026787  |
| 121 | TCGA-IB-A5SQ-01A-11R-A32O-07 | 4.17174 | 8.21088309   |
| 122 | TCGA-F2-7276-01A-11R-2156-07 | 5.52679 | 6.577128667  |
| 123 | TCGA-HZ-A4BK-01A-11R-A26U-07 | 6.51416 | 2.965909796  |
| 124 | TCGA-3A-A9IZ-01A-12R-A41B-07 | 6.68886 | 1.628269964  |
| 125 | TCGA-IB-7886-01A-11R-2156-07 | 6.99983 | -3.653599073 |
| 126 | TCGA-IB-AAUV-01A-11R-A38C-07 | 2.79126 | 6.733850865  |
| 127 | TCGA-2J-AAB4-01A-12R-A41B-07 | 7.05778 | 5.467028438  |
| 128 | TCGA-US-A77J-01A-11R-A32O-07 | 6.05543 | 5.279827295  |
| 129 | TCGA-Q3-A5QY-01A-12R-A32O-07 | 4.31793 | 0.902678517  |
| 130 | TCGA-IB-7646-01A-11R-2156-07 | 5.62652 | 6.477250239  |
| 131 | TCGA-HZ-A77O-01A-11R-A33R-07 | 4.96053 | 3.370653902  |
| 132 | TCGA-2J-AABK-01A-31R-A41B-07 | 7.44485 | 7.370488428  |
| 133 | TCGA-HV-A5A4-01A-11R-A26U-07 | 7.55433 | 5.260024358  |
| 134 | TCGA-2J-AAB6-01A-11R-A41B-07 | 5.60865 | 6.590445051  |
| 135 | TCGA-2J-AABT-01A-11R-A41B-07 | 5.46729 | 0.921961715  |
| 136 | TCGA-HZ-A77Q-01A-11R-A36G-07 | 5.85215 | 0            |
| 137 | TCGA-IB-7893-01A-11R-2204-07 | 4.0224  | 2.527766701  |
| 138 | TCGA-3E-AAAY-01A-11R-A38C-07 | 6.60355 | 6.800707192  |
| 139 | TCGA-HZ-7922-01A-11R-2156-07 | 5.47446 | 4.910522155  |
| 140 | TCGA-RB-A7B8-01A-12R-A33R-07 | 6.6652  | 4.154309447  |
| 141 | TCGA-HZ-7289-01A-11R-2156-07 | 6.23684 | 2.237178505  |
| 142 | TCGA-YY-A8LH-01A-11R-A36G-07 | 7.70003 | 5.086925761  |
| 143 | TCGA-HZ-7923-01A-12R-2156-07 | 5.31342 | 7.797268068  |
| 144 | TCGA-H8-A6C1-01A-11R-A32O-07 | 6.84396 | 3.535202248  |
| 145 | TCGA-US-A77G-01A-11R-A32O-07 | 7.54955 | 4.040098055  |
| 146 | TCGA-3A-A9IC-01A-11R-A38C-07 | 6.55757 | 1.519598411  |

|     |                              |         |              |
|-----|------------------------------|---------|--------------|
| 147 | TCGA-IB-A5ST-01A-11R-A32O-07 | 5.14435 | -2.388997667 |
| 148 | TCGA-HZ-8637-01A-11R-2404-07 | 3.50066 | 6.851977144  |
| 149 | TCGA-IB-AAUW-01A-12R-A38C-07 | 6.25423 | 5.620234412  |
| 150 | TCGA-3A-A9I9-01A-11R-A38C-07 | 5.33847 | 5.488491899  |
| 151 | TCGA-2J-AABR-01A-11R-A41B-07 | 6.64198 | 4.933639476  |
| 152 | TCGA-H6-A45N-01A-11R-A26U-07 | 6.58041 | 6.884691053  |
| 153 | TCGA-FB-AAQ3-01A-11R-A41B-07 | 6.14932 | 2.773686386  |
| 154 | TCGA-HV-AA8X-01A-11R-A39D-07 | 7.41817 | 4.513438569  |
| 155 | TCGA-IB-8126-01A-11R-2404-07 | 4.65671 | 6.241232368  |
| 156 | TCGA-HV-A7OP-01A-11R-A33R-07 | 5.97106 | -0.6938059   |
| 157 | TCGA-HZ-A8P0-01A-11R-A36G-07 | 6.13735 | 1.747126802  |
| 158 | TCGA-F2-6879-01A-11R-2156-07 | 6.07068 | -4.222841543 |
| 159 | TCGA-S4-A8RO-01A-12R-A37L-07 | 5.98895 | 5.055791599  |
| 160 | TCGA-HZ-A49H-01A-11R-A26U-07 | 5.783   | 6.741765912  |
| 161 | TCGA-L1-A7W4-01A-12R-A36G-07 | 6.12292 | 2.588378511  |
| 162 | TCGA-RL-AAAS-01A-32R-A39D-07 | 5.78813 | 4.450788743  |
| 163 | TCGA-XN-A8T3-01A-11R-A36G-07 | 5.87348 | 4.858154339  |
| 164 | TCGA-IB-AAUN-01A-12R-A38C-07 | 5.7523  | 3.872985975  |
| 165 | TCGA-HZ-8005-01A-11R-2204-07 | 2.91989 | 2.775374478  |
| 166 | TCGA-XD-AAUL-01A-21R-A39D-07 | 5.76892 | 3.891042452  |
| 167 | TCGA-IB-AAUP-01A-11R-A37L-07 | 5.16712 | 4.24820827   |
| 168 | TCGA-HV-A5A6-01A-11R-A26U-07 | 6.47052 | 2.201655171  |
| 169 | TCGA-HZ-8519-01A-11R-2404-07 | 5.27665 | 10.14890719  |
| 170 | TCGA-IB-7885-01A-11R-2156-07 | 5.63459 | 2.78353623   |
| 171 | TCGA-2L-AAQL-01A-11R-A38C-07 | 8.08027 | 7.126242186  |
| 172 | TCGA-IB-7644-01A-11R-2156-07 | 6.85167 | 2.837153559  |
| 173 | TCGA-IB-7889-01A-11R-2156-07 | 6.29741 | 4.864896003  |
| 174 | TCGA-HZ-7919-01A-11R-2156-07 | 6.79623 | 5.88590886   |
